# Supplementary material for: Electrochemical detection of protein by using magnetic graphene-based target enrichment and copper nanoparticles-assisted signal amplification
Source: Royal Society of Chemistry journal article supplement (doi:10.1039/c5an01742d), 2015-01-01
Supplement: c5an01742d1.pdf [file c5an01742d1.pdf]

Electronic Supplementary Material (ESI) for Analyst.  
This journal is © The Royal Society of Chemistry 2015

## Supplementary Information

### Electrochemical detection of protein by using magnetic graphene-based target enrichment and copper nanoparticles-assisted signal amplification

Jing Zhao,<sup>a</sup> Yun Lv,<sup>a</sup> Mingyang Kang,<sup>a</sup> Keming Wang<sup>\*b</sup> and Yang Xiang<sup>\*c</sup>

<sup>a</sup>Laboratory of Biosensing Technology, School of Life Sciences, Shanghai University, Shanghai 200444, P. R. China

<sup>b</sup>Department of Oncology, the Second Affiliated Hospital of Nanjing Medical University, Nanjing 210011, P. R. China

<sup>c</sup>State Key Laboratory of Pharmaceutical Biotechnology, School of Life Science, Nanjing University, Nanjing 210093, P. R. China

\* Corresponding author: wangkm\_nj@sohu.com;

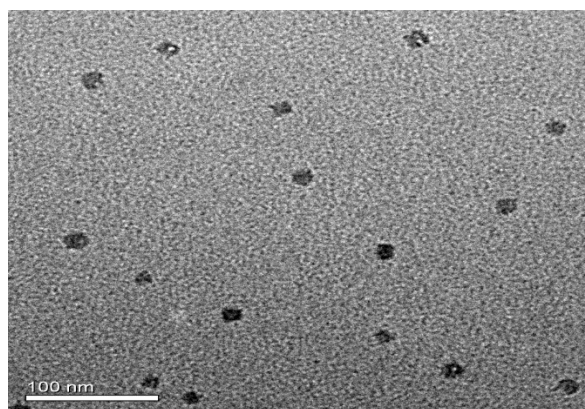

Fig. S1. TEM images of dsDNA-templated CuNPs
